# Supplementary material for: Novel benzothiazole derivatives with a broad antifungal spectrum: design, synthesis and structure–activity relationships
Source: Royal Society of Chemistry journal article supplement (doi:10.1039/c3md00215b), 2013-01-01

## Supporting information

### **Novel Benzothiazole Derivatives with Broad Antifungal Spectrum: Design, Synthesis and Structure-Activity Relationships**

Yang Liu, Yan Wang, Guoqiang Dong, Yongqiang Zhang, Shanchao Wu, Zhenyuan  
Miao, Jianzhong Yao, Wannian Zhang\* and Chunquan Sheng\*

*School of Pharmacy, Second Military Medical University, 325 Guohe Road, Shanghai  
200433, People's Republic of China*

\*To whom correspondence should be addressed. For W. N. Zhang: Phone/Fax,  
86-21-81870243, E-mail, zhangwnk@hotmail.com; For C. Q. Sheng: Phone/Fax,  
86-21-81871233, E-mail, shengcq@hotmail.com

#### **Contents**

NMR spectra and MS data for the representative compounds (**6a**, **6m**, **6p**, **13a**, **13b**,  
**20**).

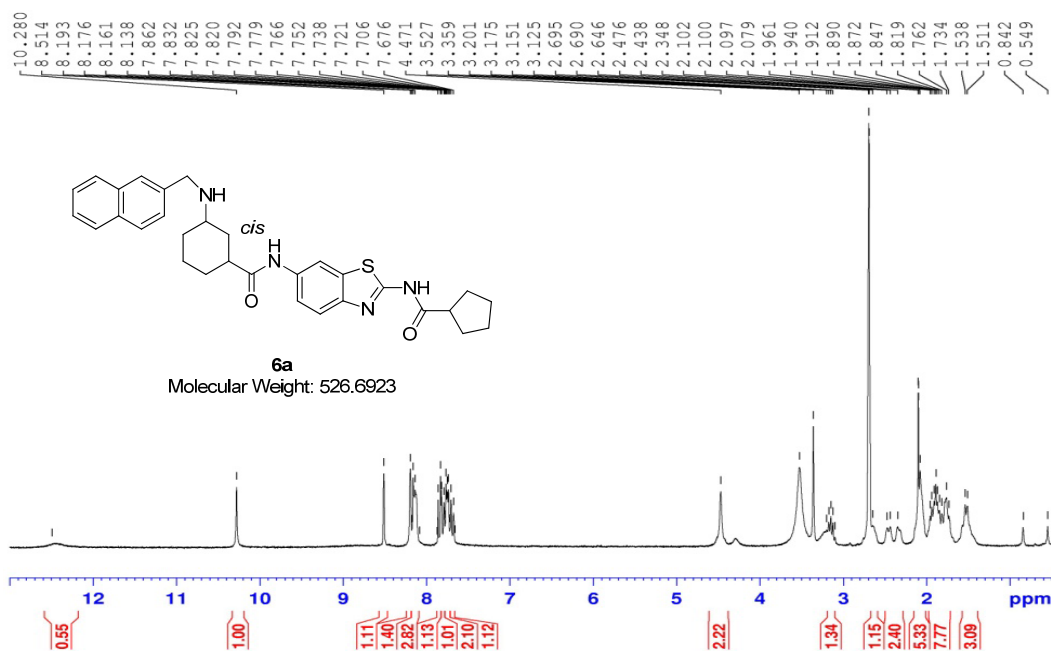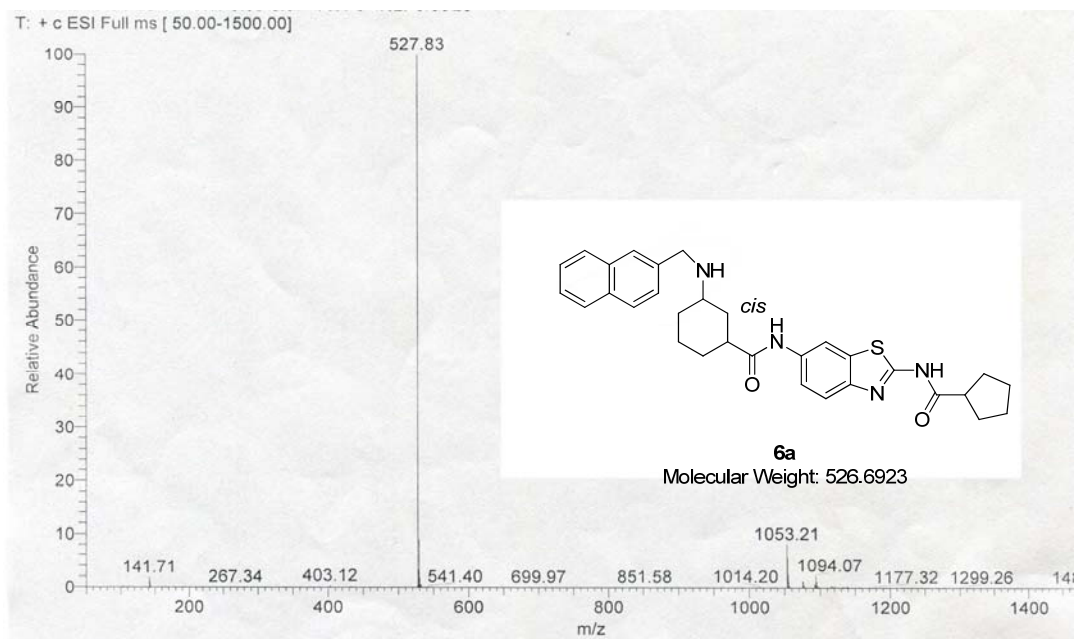

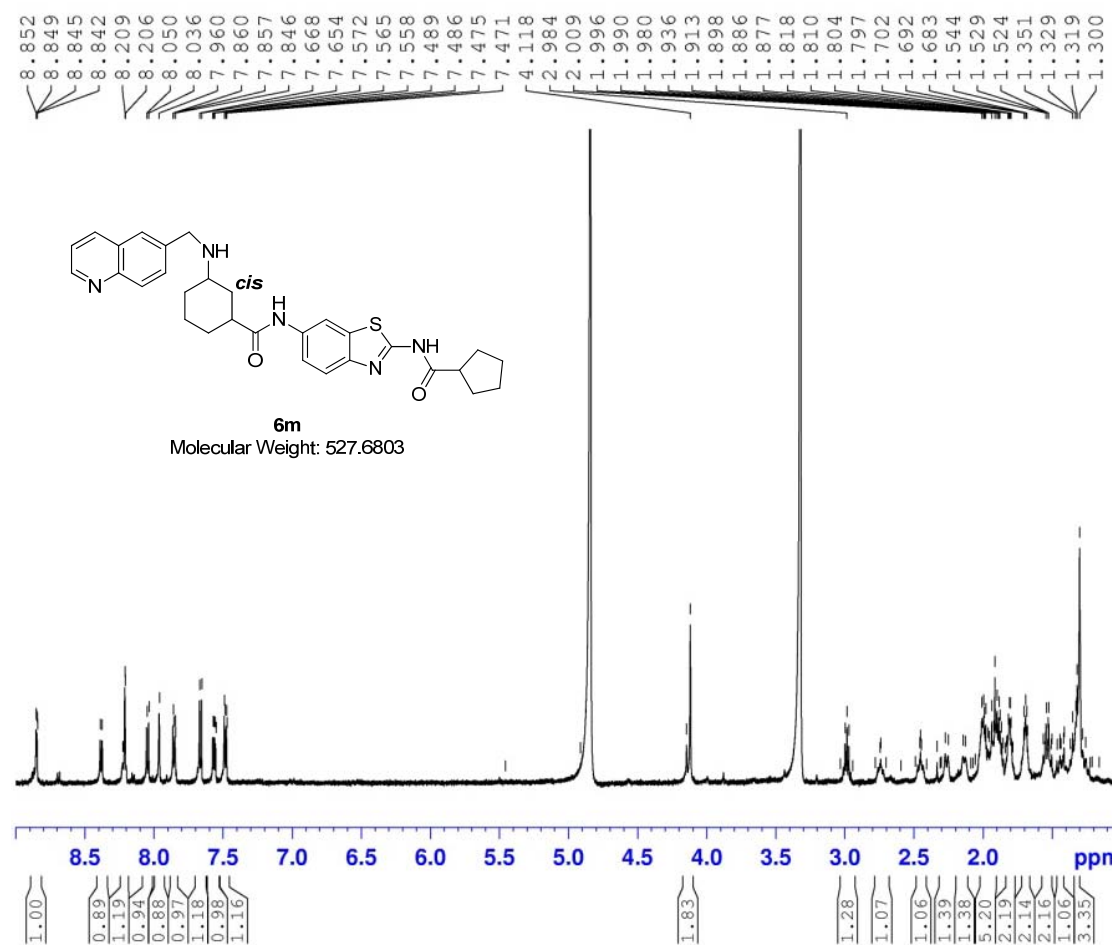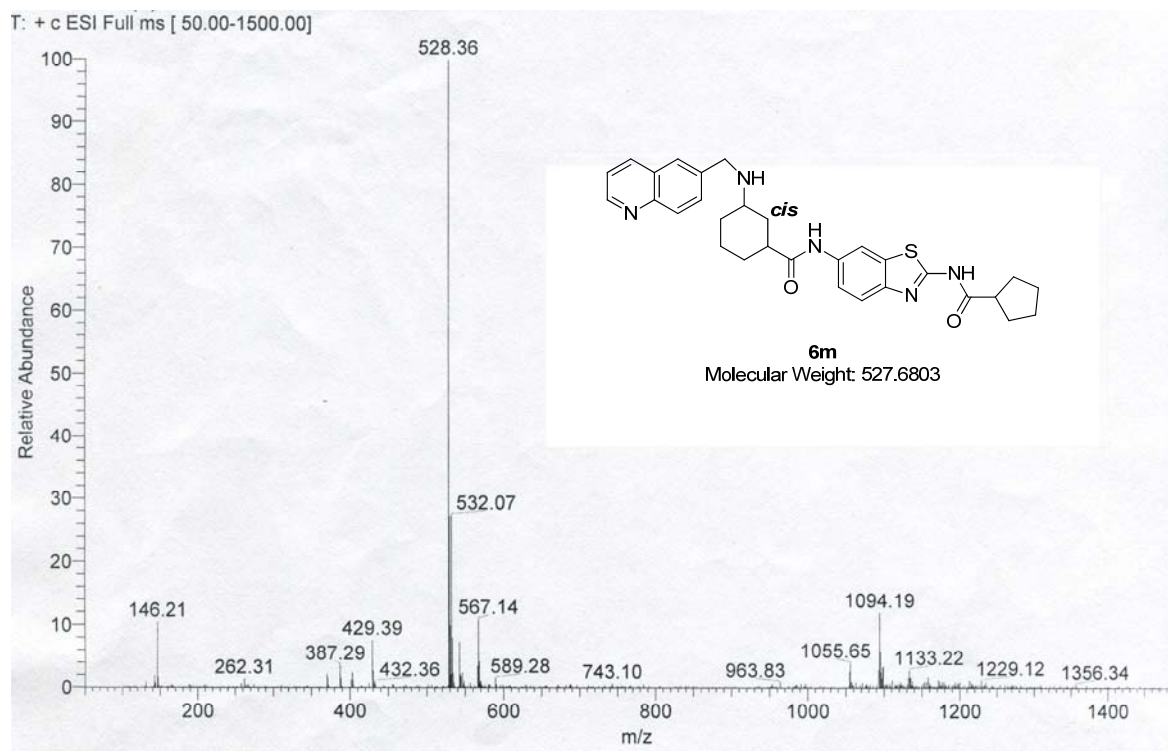

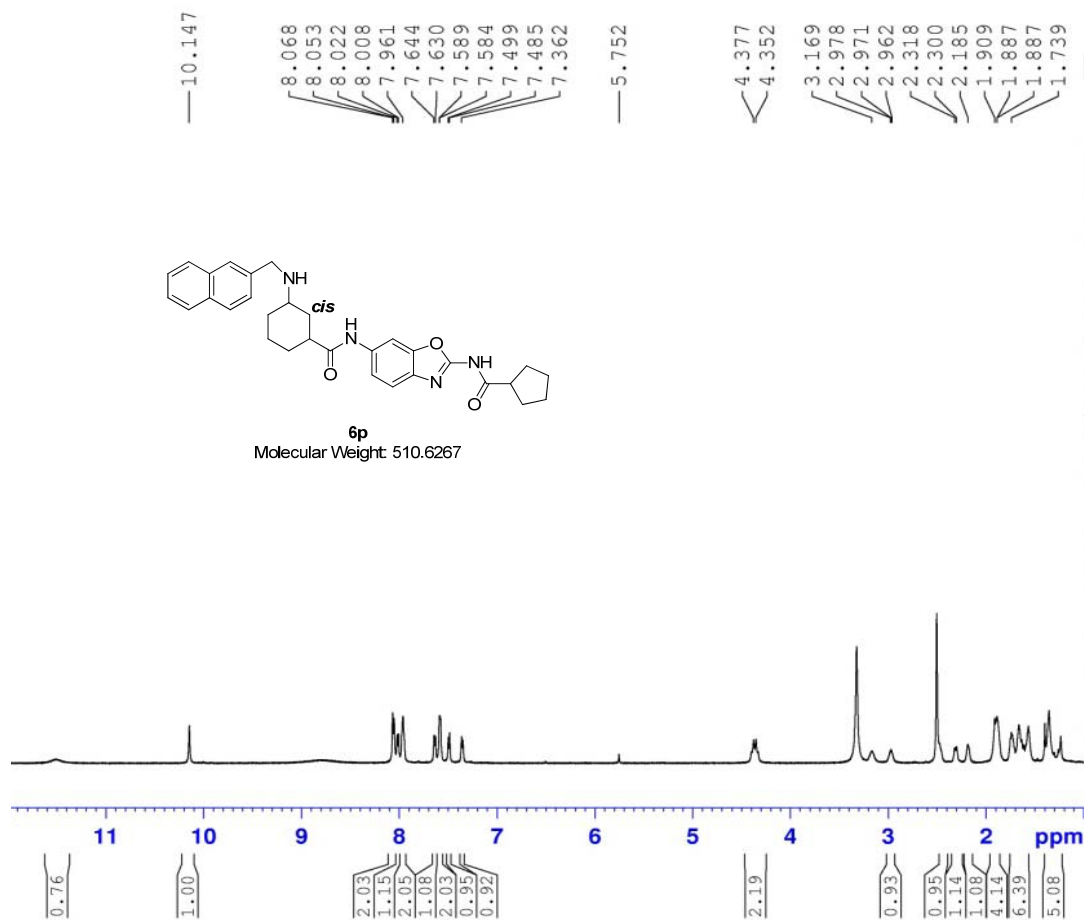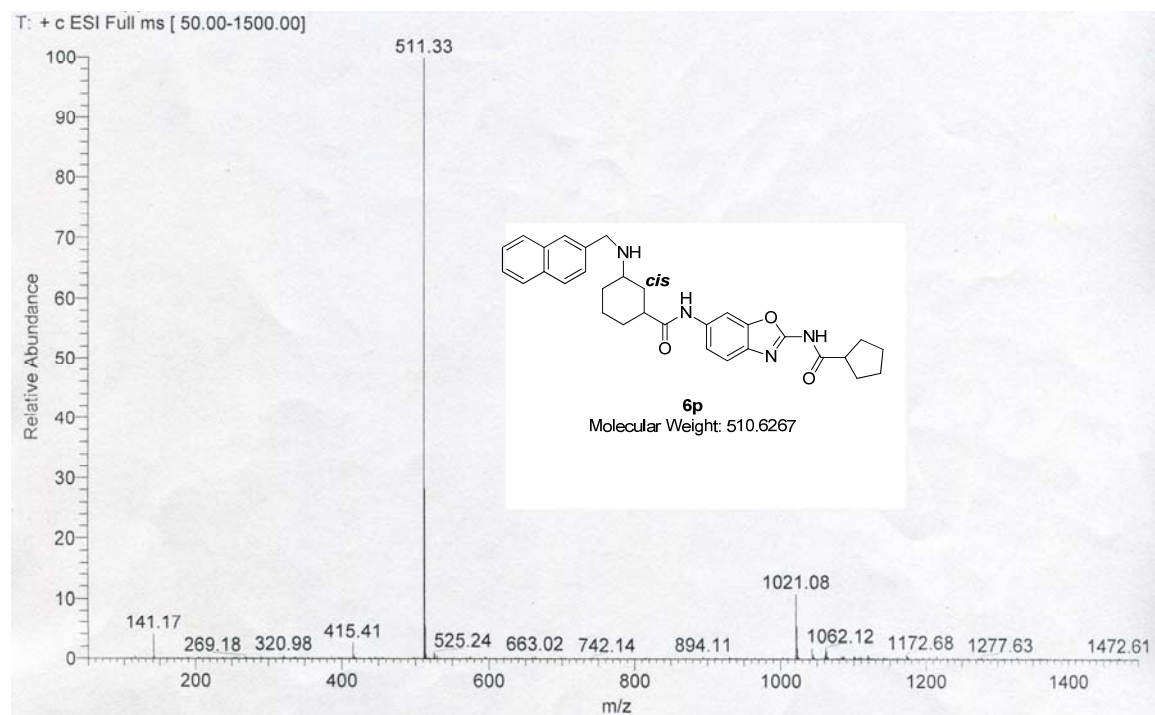

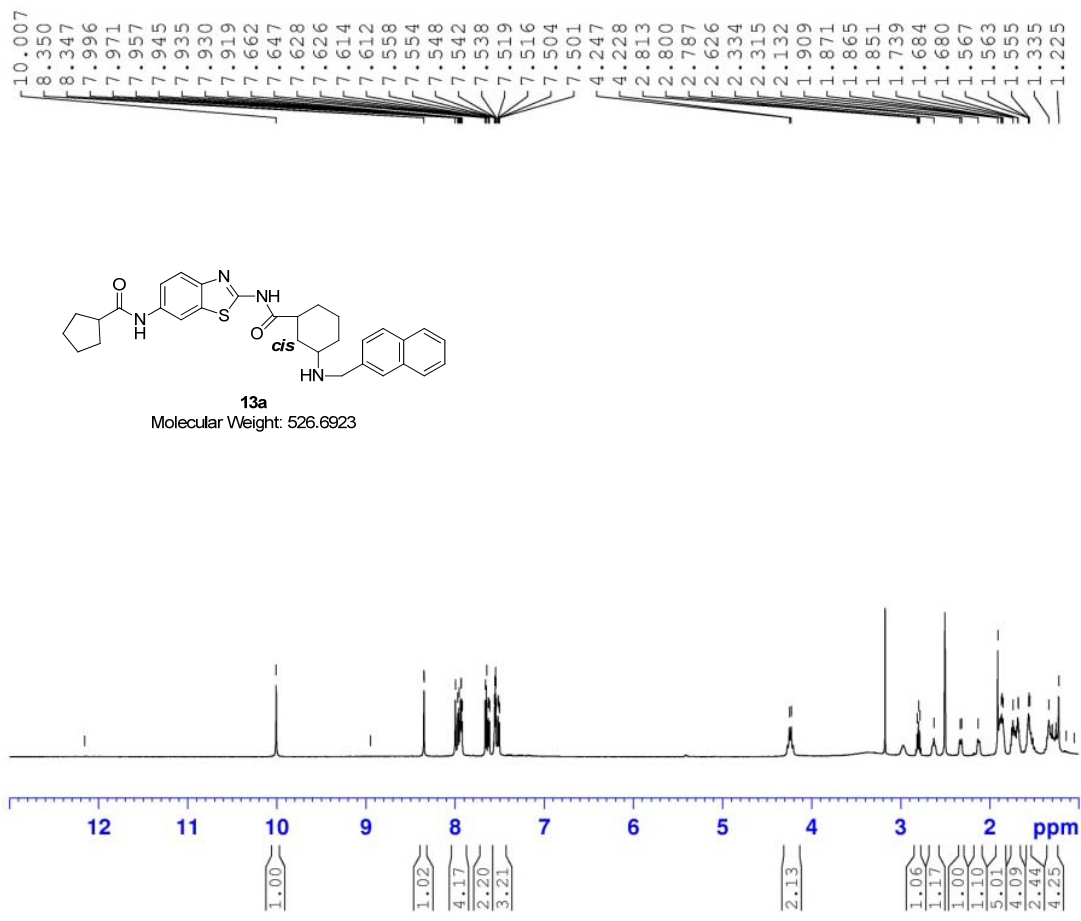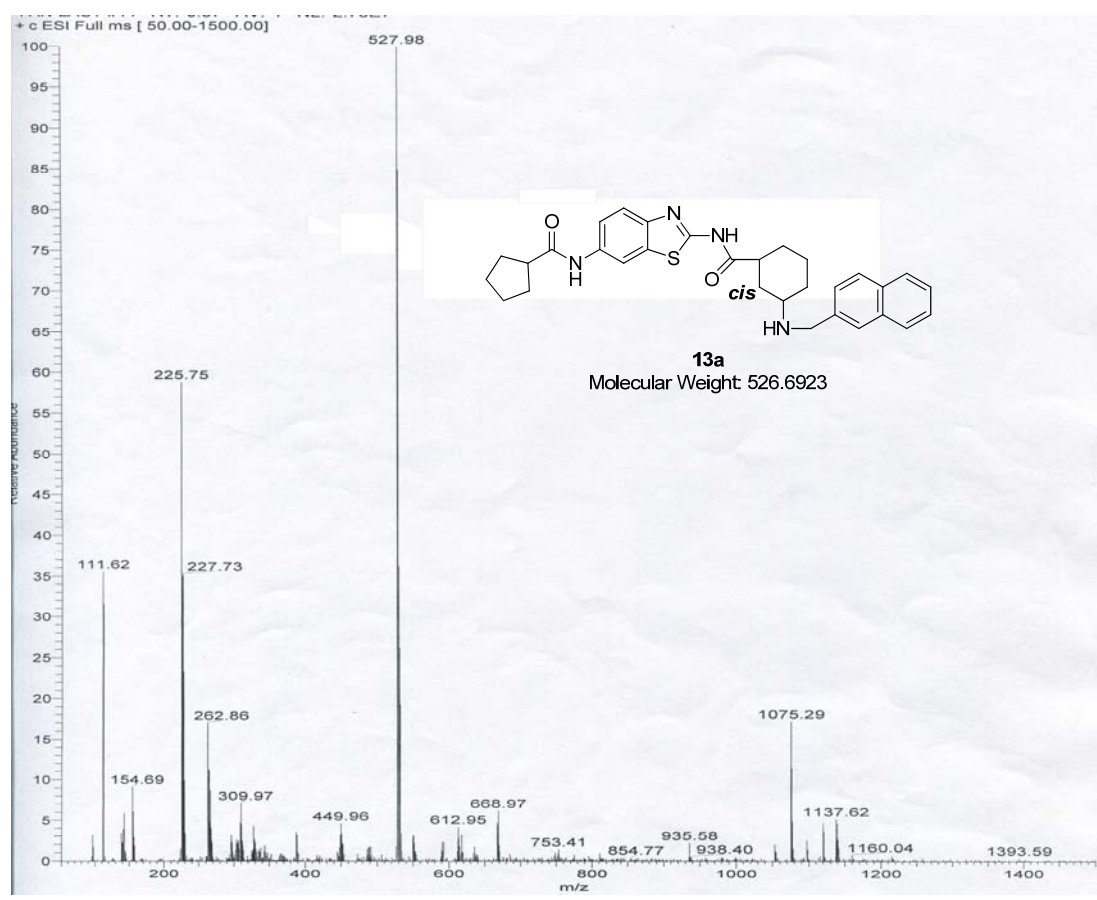

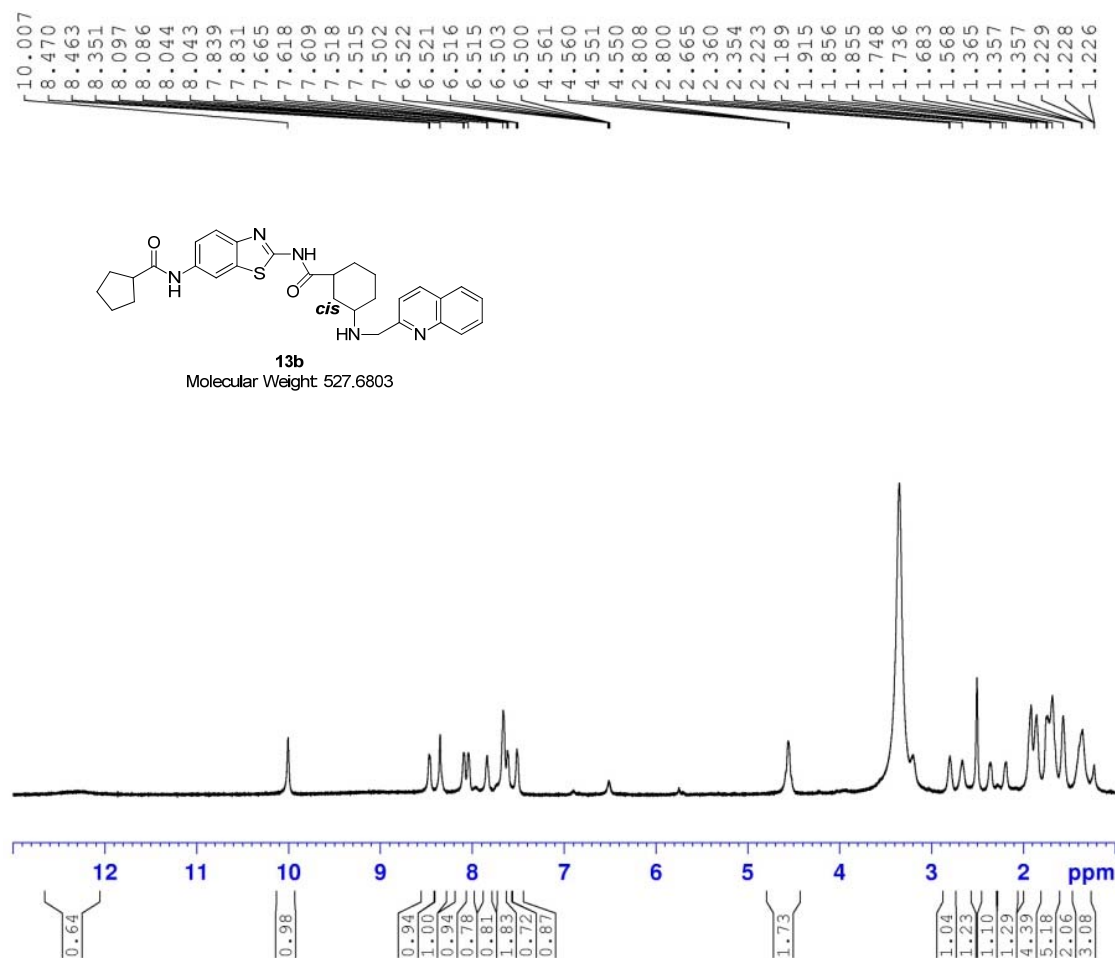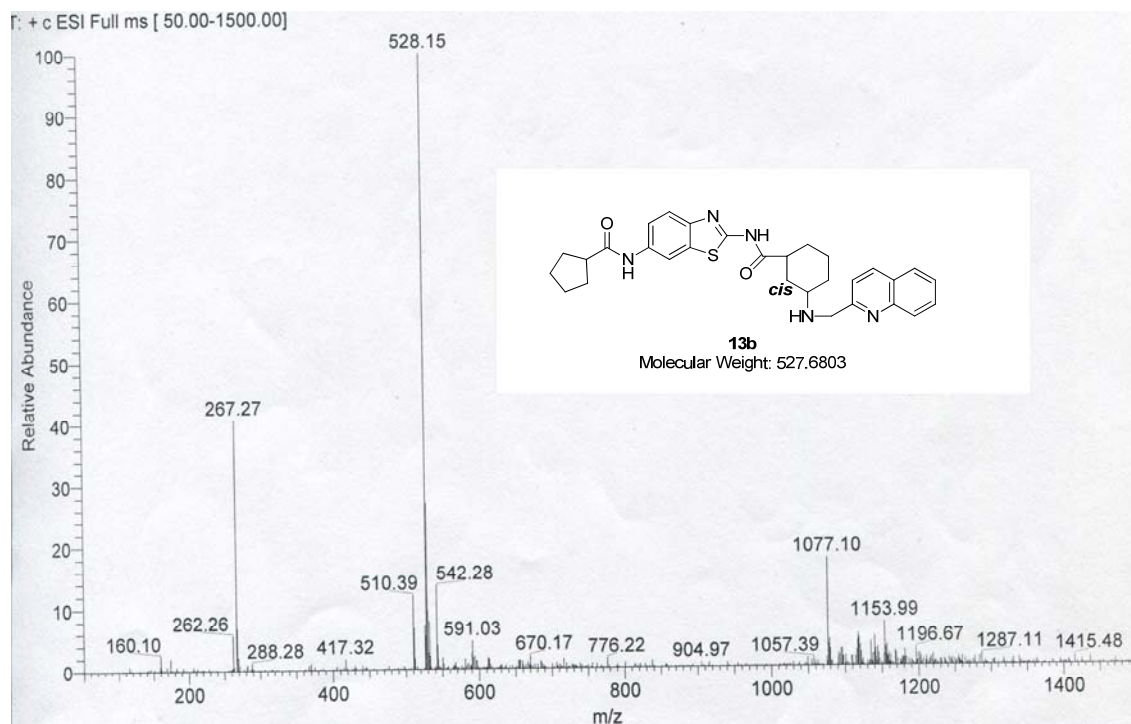



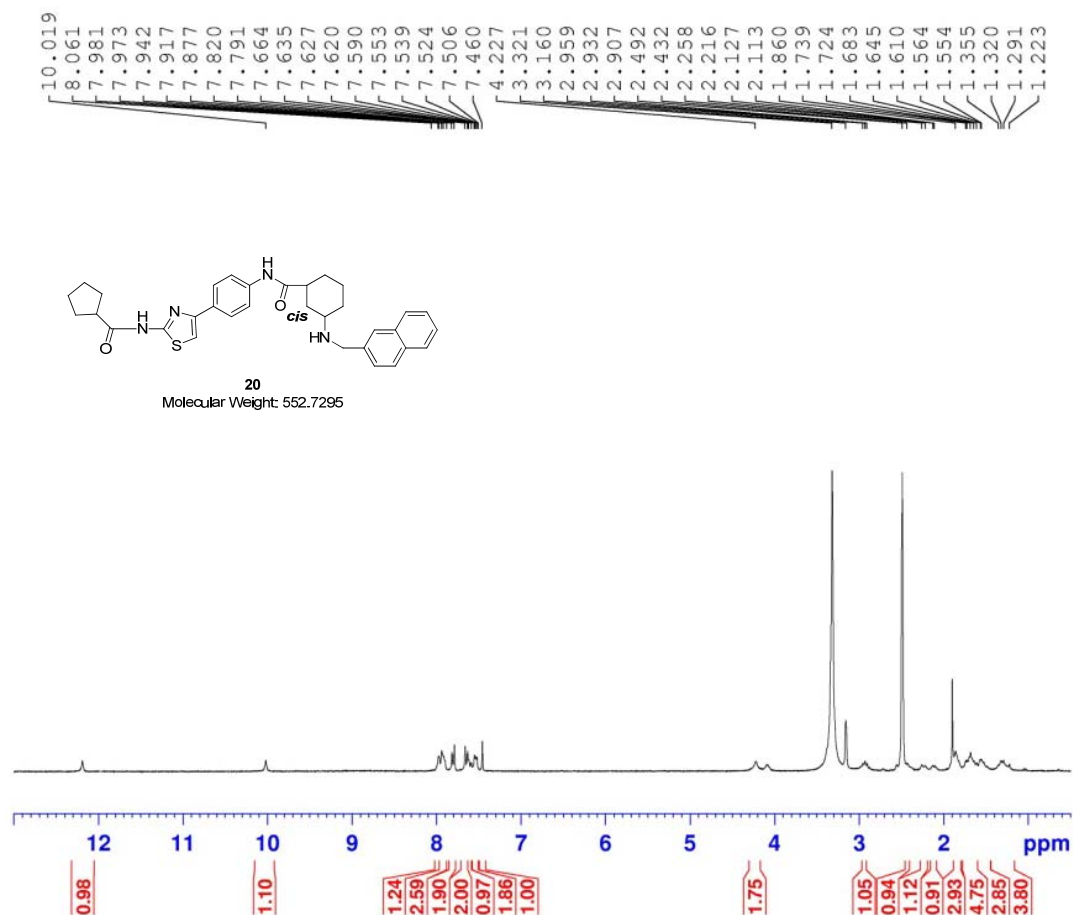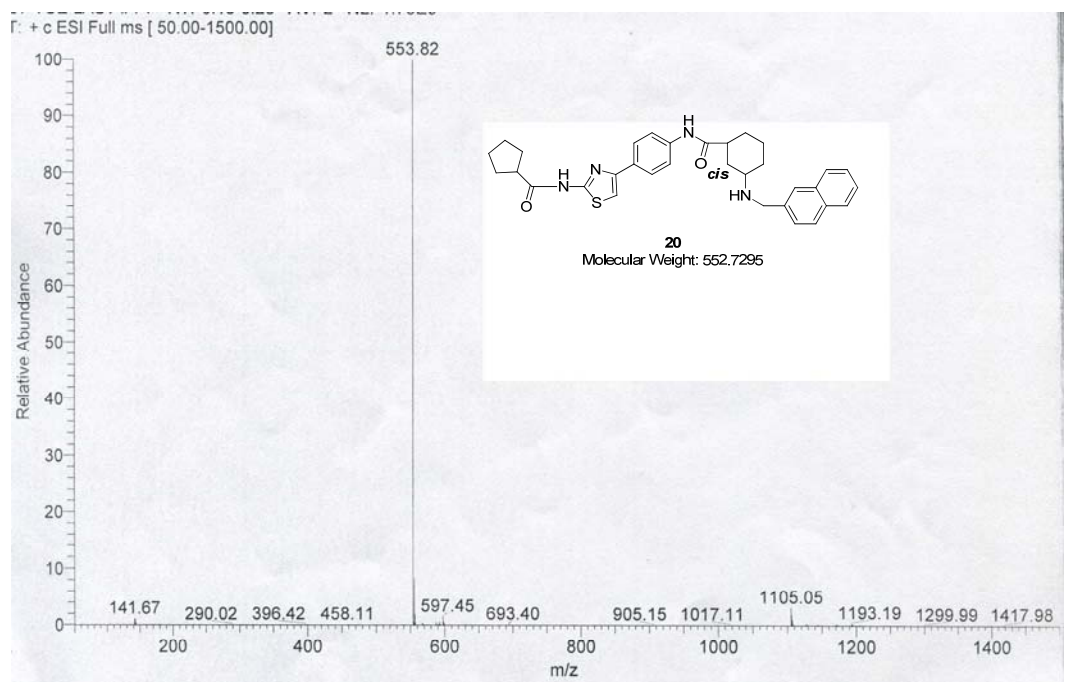

Supplement: c3md00215b.pdf [file c3md00215b.pdf]
